# Supplementary material for: Exploring the influence of trust relationships on motivation in the health sector: a systematic review
Source: Springer Nature journal article supplement (doi:10.1186/s12960-015-0007-5), 2015-03-30
Supplement: MOESM1 [file 12960_2015_7_MOESM1_ESM.pdf]

## Additional File 1: Search Strategy

| Databases                                            | Date of Final Search | Results      |                             |                    |                             |                       |                          |                              |
|------------------------------------------------------|----------------------|--------------|-----------------------------|--------------------|-----------------------------|-----------------------|--------------------------|------------------------------|
|                                                      |                      | Total Search | Relevant Articles Retrieved | Combined Databases | After Removal of Duplicates | After Title Screening | After Abstract Screening | Eligible Articles for Review |
| Africa-Wide Information                              | 17/11/2013           | 1257         | 117                         | 1420               | 1140                        | 204                   | 42                       | 30                           |
| Cumulative Index of Nursing & Allied Health (CINHAL) | 17/11/2013           | 3840         | 172                         |                    |                             |                       |                          |                              |
| PsycINFO                                             | 17/11/2013           | 3893         | 360                         |                    |                             |                       |                          |                              |
| PubMed                                               | 18/11/2013           | 5338         | 383                         |                    |                             |                       |                          |                              |
| Scopus                                               | 18/11/2013           | 3389         | 388                         |                    |                             |                       |                          |                              |
| <b>TOTAL</b>                                         |                      | 17717        | 1420                        | 1420               | 1140                        | 204                   | 42                       | 30                           |

### PubMed (383)

((((((((((("Motivation"[Mesh]) OR motivation) OR "Job Satisfaction"[Mesh]) OR job satisfaction) OR "Attitude of Health Personnel"[Mesh]) OR Attitude of Health Personnel) OR staff attitude) OR team work in nursing) OR team work) OR staff retention))

AND

((((((((((((((((((("Trust"[Mesh]) OR trust) OR "Physician-Nurse Relations"[Mesh]) OR Physician-Nurse Relations) OR "Nurse-Patient Relations"[Mesh]) OR Nurse-Patient Relations) OR "Professional-Patient Relations"[Mesh]) OR Professional-Patient Relations) OR "Physician-Patient Relations"[Mesh]) OR Physician-Patient Relations) OR "Dentist-Patient Relations"[Mesh]) OR Dentist-Patient Relations) OR "Patient Care Team"[Mesh]) OR Patient Care Team) OR "Health Services Research"[Mesh]) OR Health Services Research) OR "Organizational Culture"[Mesh]) OR Organizational Culture)

Filters: Journal Article; Free full text available; Full text available; Publication date from 2003/01/01 to 2013/12/31; Humans; English; MEDLINE; Nursing journals; Dental journals

## **Cumulative Index of Nursing and allied Health (CINHAL) via EBSCOhost (172)**

(MM "Motivation+") OR motivation OR trust OR (MM "Trust") OR "job satisfaction" OR (MM "Job Satisfaction+") OR relationship\* OR (MM "Interpersonal Relations+") OR (MM "Physician-Patient Relations") OR (MM "Interinstitutional Relations") OR (MM "Dentist-Patient Relations") OR (MM "Patient-Family Relations") OR (MM "Professional-Patient Relations+") OR (MM "Interpersonal Relationships (Omaha)") OR (MM "Employer-Employee Relations+") OR (MM "Teamwork") OR (MM "Management Styles") OR (MH "Attitude of Health Personnel") OR (MH "Employee Attitudes") OR "staff attitude"

AND

OR (MH "Health Personnel, Unlicensed") OR (MH "Personnel, Health Facility") OR (MH "Health Personnel as Patients") OR (MH "Rural Health Personnel") OR (MH "Health Personnel, Infected") OR (MH "Alternative Health Personnel") OR (MH "Health Personnel, Minority") OR (MH "Allied Health Personnel") OR (MH "Health Personnel") OR "health personnel" OR "healthcare provider\*" OR "health care provider\*" OR "health worker\*" OR "healthcare worker\*" OR (MH "Hospitals, Public") OR (MH "Hospitals, Pediatric") OR (MH "Hospitals, Psychiatric") OR (MH "Organizations, For Profit") OR (MH "Hospitals, Urban") OR (MH "Hospitals, Special") OR (MH "Hospitals, Rural") OR (MH "Hospitals, Community") OR (MH "Hospitals") OR hospital\* OR "health organi?ation\*" OR (MH "Health Maintenance Organizations") OR (MH "State Allied Health Organizations") OR (MH "Allied Health Organizations") OR (MH "Organizations, For Profit") OR (MH "Mental Health Organizations") OR (MH "Health Facility Administration") OR "healthcare organi?ation\*" OR "health institution\*" OR "healthcare institution\*" OR (MM "Primary Health Care") OR (MM "Health Care Reform+") OR (MM "Health Care Delivery+") OR "primary health care" OR "healthcare sector" OR "health care sector" OR "health sector" OR (MM "Health Care Industry")

Limiters - Linked Full Text; Abstract Available; Published Date: 2003/01/01 - 2013/12/31

Expanders - Apply related words; also search within the full text of the articles

Search modes - Boolean/Phrase

## **PsycINFO via EBSCOhost (360)**

DE "Motivation" OR MM "Educational Incentives" OR MM "Employee Motivation" OR MM "Extrinsic Motivation" OR MM "Intrinsic Motivation" OR MM "Monetary Incentives" OR Motivation OR DE "Trust (Social Behaviour)" OR Trust OR DE "Employee Attitudes" OR DE "Satisfaction" OR DE "Career Change" OR DE "Employee Engagement" OR DE "Employee Retention" OR DE "Job Enrichment" OR DE "Job Involvement" OR DE "Organizational Commitment" OR DE "Quality of Work Life" OR DE "Role Satisfaction" OR "Job Satisfaction" OR DE "Relationship Satisfaction" OR DE "Interpersonal Relationships" OR Relationship OR Teamwork OR Retention

AND

DE "Professional Personnel" OR DE "Allied Health Personnel" OR DE "Medical Personnel" OR "Health Personnel" OR "Healthcare Provider\*" OR "Health Care Provider\*" OR "Healthcare Worker\*" OR "Health Worker\*" OR DE "Hospitals" OR Hospitals OR "Health Organization\*" OR "Healthcare Organization\*" OR "Health Care Organization\*" OR "Health Institution\*" OR "Healthcare Institution\*" OR "Health Care Institution\*" OR DE "Primary Health Care" OR DE "Health Care Utilization" OR DE "Health Care Reform" OR DE "Health Care Policy" OR DE "Health Care Delivery" OR DE "Health Care Services" OR DE "Health Care Administration" OR "Primary Health Care" OR "Health Sector" OR "Healthcare Sector" OR "Health Care Sector" OR "Healthcare Industry" OR "Health Care Industry"

### **Africa-Wide Information via EBSCOhost (117)**

KW motivation OR SM motivation OR KW trust OR TX "job satisfaction" OR TX relationship\* OR TX teamwork OR TX "staff attitude\*" OR TX retention

AND

KW "health personnel" OR TX "healthcare provider\*" OR TX "health care provider\*" OR KW "health worker\*" OR TX "healthcare worker" OR TX "health care worker\*" OR SM hospital\* OR KW "health organization\*" OR TX "health care organization\*" OR TX "healthcare organization\*" OR TX "healthcare institution\*" OR TX "health care institution\*" OR TX "health institution\*" OR TX "primary health care" OR TX "health care sector" OR TX "healthcare sector" OR KW "health sector" OR TX "healthcare industry"

Limiters - Year Published: 2003-2013; Language: English

Search modes - Boolean/Phrase

**Scopus (388)**

((TITLE-ABS-KEY(motivation)) OR (TITLE-ABS-KEY(trust)) OR (ALL("job satisfaction")) OR (ALL(teamwork)) OR (ALL("staff attitude")) OR (ALL("provider-patient relationship")) OR (ALL("patient-provider relationship")) (ALL(retention)) OR (TITLE-ABS-KEY(retention)))

AND

((ALL("health personnel")) OR (TITLE-ABS-KEY("health personnel")) OR (ALL("healthcare providers")) OR (ALL("health care providers")) OR (ALL("healthcare workers")) OR (ALL("health care workers")) OR (ALL("health workers"))) OR ((TITLE-ABS-KEY(hospital)) OR (ALL("health organi?ation")) OR (ALL("health care organi?ation")) OR (ALL("healthcare organi?ation")) OR (ALL("healthcare institution")) OR (ALL("health care institution")) OR (ALL("health institution"))) OR ((ALL("primary health care")) OR (ALL("health care sector")) OR (ALL("healthcare sector")) OR (ALL("health sector")) OR (ALL("healthcare industry"))))

AND

(LIMIT-TO(PUBYEAR, 2013) OR LIMIT-TO(PUBYEAR, 2012) OR LIMIT-TO(PUBYEAR, 2011) OR LIMIT-TO(PUBYEAR, 2010) OR LIMIT-TO(PUBYEAR, 2009) OR LIMIT-TO(PUBYEAR, 2008) OR LIMIT-TO(PUBYEAR, 2007) OR LIMIT-TO(PUBYEAR, 2006) OR LIMIT-TO(PUBYEAR, 2005) OR LIMIT-TO(PUBYEAR, 2004) OR LIMIT-TO(PUBYEAR, 2003)) AND (LIMIT-TO(DOCTYPE, "ar") OR LIMIT-TO(DOCTYPE, "re") OR LIMIT-TO(DOCTYPE, "ip") OR LIMIT-TO(DOCTYPE, "ar") OR LIMIT-TO(DOCTYPE, "re") OR LIMIT-TO(DOCTYPE, "ip")) AND (LIMIT-TO(LANGUAGE, "English")) AND (LIMIT-TO(SRCTYPE, "j"))
