# Supplementary material for: Exploring the influence of trust relationships on motivation in the health sector: a systematic review
Source: Springer Nature journal article supplement (doi:10.1186/s12960-015-0007-5), 2015-03-30
Supplement: MOESM2 [file 9765702]

Additional file 2: Data Extraction Form

| Author(s) & Year of Publication | Internal/Individual Determinants                                               |              | Organisational/Institutional Determinants            |                                                                                                                                                                                               | Socio-Cultural Determinants |                                                              | Relationship Types Identified             | Trust Issues Identified                                                                                |
|---------------------------------|--------------------------------------------------------------------------------|--------------|------------------------------------------------------|-----------------------------------------------------------------------------------------------------------------------------------------------------------------------------------------------|-----------------------------|--------------------------------------------------------------|-------------------------------------------|--------------------------------------------------------------------------------------------------------|
|                                 | Motivators                                                                     | Demotivators | Motivators                                           | Demotivators                                                                                                                                                                                  | Motivators                  | Demotivators                                                 |                                           |                                                                                                        |
| Agyepong et al 2003 [1]         |                                                                                |              | Additional duty hours allowance; In-service training | Low salaries; Lack of essential equipment, tools and supplies for work; Lack of work transport; Delayed promotions; Inadequate staffing; Housing; Inequitable additional duty hours allowance |                             | Effect of the job on family; Social isolation and loneliness |                                           | Outward display of frustration through rudeness, anger, unfriendly behavior and resentment to patients |
| Alhassan et al 2013[2]          |                                                                                |              | Availability of drugs and medical resources;         | Low salaries; Lack of transport to work; Inadequate resources; Lack of career development prospects                                                                                           |                             |                                                              | Poor relations due to resource inadequacy | Trusting relations through professionalism                                                             |
| Campbell et al 2011[3]          | Altruism; Achievement/patient recoveries; Personal experiences with HIV; Pride |              |                                                      | Staff shortages; Inadequate drugs and supplies;                                                                                                                                               |                             |                                                              | Relationship with patients                | Losing confidence to patients                                                                          |
| Chandler et al 2009[4]          | Altruism; Pride; Respect                                                       |              |                                                      | Low salaries; Poor working conditions;                                                                                                                                                        | Social status expectations  |                                                              |                                           | Patient respect and appreciation; Lack of respect between ranks                                        |

|                                     |                                                  |                                                                                       |                                                                                       |                                                                                                                                                                                                                          |                                    |  |                                                                                                                                                |                                                                                                                                                                                                                   |
|-------------------------------------|--------------------------------------------------|---------------------------------------------------------------------------------------|---------------------------------------------------------------------------------------|--------------------------------------------------------------------------------------------------------------------------------------------------------------------------------------------------------------------------|------------------------------------|--|------------------------------------------------------------------------------------------------------------------------------------------------|-------------------------------------------------------------------------------------------------------------------------------------------------------------------------------------------------------------------|
| Dickin, Dollahite & Habicht 2011[5] | Altruism/desire to help; Autonomy/freedom; Pride |                                                                                       | Supportive supervision; Benefits                                                      | Work overload; Low pay;                                                                                                                                                                                                  |                                    |  | Caring relationships with participants; Relationships with supervisors; Teamwork and good relationships with colleagues                        | Trust with supervisor; Respect from supervisor                                                                                                                                                                    |
| Dieleman et al 2003 [6]             | Respect; Job and income stability; love for work |                                                                                       | Recognition; Appreciation and support by managers and colleagues; In-service training | Low income and allowance; Difficult transportation; Lack of updated information and knowledge; Heavy workload; Supervision without feedback; Inadequate performance appraisal                                            | Community appreciation and respect |  | Recognition from colleagues, managers, and clients; Good relationships with managers and colleagues at workplace. Relationships with community | People believe in HWs, people ask for help when needed and respect them; I need to work hard for them; Inviting health workers to participate in community activities and parting in health educational campaigns |
| Dieleman et al 2006[7]              | Feeling responsible;                             | Partner living far away; Living far away from urban centre and decision making places | In-service training: Recognition and appreciation                                     | Lack of material and equipment; Lack of recognition; Difficult living conditions; Lack of job descriptions; Subjective: Poor functioning of the health committee performance appraisal; Poor management; Lack of rewards |                                    |  | Recognition and appreciation by superiors, colleagues and patients                                                                             | Having good colleagues; Holding staff responsible                                                                                                                                                                 |

|                                 |                                                                                                                                                                  |                                                                                    |                                                                                                                                                                                                                 |                                                                                                              |                                                                                                                       |                                                                                          |                                                                                                                                                                     |                                                                                                                                                      |
|---------------------------------|------------------------------------------------------------------------------------------------------------------------------------------------------------------|------------------------------------------------------------------------------------|-----------------------------------------------------------------------------------------------------------------------------------------------------------------------------------------------------------------|--------------------------------------------------------------------------------------------------------------|-----------------------------------------------------------------------------------------------------------------------|------------------------------------------------------------------------------------------|---------------------------------------------------------------------------------------------------------------------------------------------------------------------|------------------------------------------------------------------------------------------------------------------------------------------------------|
| Franco et al 2004[8]            | Self-efficacy/desire for achievement; Work locus of control (goals and preferences); Pride; Attitudes to change (motives); Autonomy: Values (work, self-respect) |                                                                                    | Organizational citizenship behavior; Management openness; Resource availability; Job properties; Regular feedback; Organizational culture; Management practices; Communication ; Recognition; Financial rewards | Lack of transparency in performance appraisals; Little opportunity for promotion;                            | Societal values and beliefs; Culture and organizational function; Culture and provider-patient R/ship; Social respect |                                                                                          | Teamwork; social respect; increasing pride through recognition by hospital and community; provider-patient relationship; work relationships within the organization | Communication; Management support; Recognition; Organizational citizenship through rewards to encourage teamwork; Managers perceived to be less open |
| Greenspan et al 2013[9]         | Altruism/ dedication to public service; Knowledge gained                                                                                                         |                                                                                    | Financial incentives; Work equipment and supplies; In-service training; Adequate supervision                                                                                                                    | Inadequate remuneration; Inadequate supplies                                                                 |                                                                                                                       | Moral, monetary, material and work-related support from family; Recognition from society | Relationships with community; Relationship with supervisor                                                                                                          | Insults from community members; Trusting supervision                                                                                                 |
| Hegney, Plank & Parker 2006[10] |                                                                                                                                                                  | Emotional challenges; Lack of autonomy; High work stress; Physical demands of work | Teamwork and support; Availability of equipment for work; Career advancement prospects                                                                                                                          | Poor remuneration; Lack of rewards for skills and experience; Inconvenient ; working hours; Workplace safety |                                                                                                                       | Poor regard of nursing by community                                                      | Teamwork and support from colleagues                                                                                                                                |                                                                                                                                                      |
| Kahler et al 2012[11]           | Influence on the job/autonomy; Patient-centred care                                                                                                              |                                                                                    | Transparency                                                                                                                                                                                                    |                                                                                                              |                                                                                                                       |                                                                                          | Good relationships with colleagues                                                                                                                                  |                                                                                                                                                      |

|                                |                                             |  |                                            |                                                                                                                                                                                                                                |  |                                                          |                                                                                                                                       |                                                                                                                                                                    |
|--------------------------------|---------------------------------------------|--|--------------------------------------------|--------------------------------------------------------------------------------------------------------------------------------------------------------------------------------------------------------------------------------|--|----------------------------------------------------------|---------------------------------------------------------------------------------------------------------------------------------------|--------------------------------------------------------------------------------------------------------------------------------------------------------------------|
| Kok & Muula 2013[12]           |                                             |  |                                            | Low salary; Poor access to training; Heavy workload; Extensive job description; Lack of supervision, communication & transport.                                                                                                |  | Low recognition                                          | Relationship with supervisors and management                                                                                          |                                                                                                                                                                    |
| Kontodimopoulos et al 2009[13] | Achievements (pride, appreciation, respect) |  | Remuneration; Relationship with co-workers |                                                                                                                                                                                                                                |  | Social acceptance                                        | Relationships with supervisors and colleagues; Professional relationships                                                             | Appreciation, respect and social acceptance                                                                                                                        |
| Kudo et al 2010[14]            | Pride; Altruism; Personal growth            |  |                                            | Poor communication; Low salaries; Workplace safety; Poor working relationships with superiors and colleagues                                                                                                                   |  |                                                          | Relationship with superiors and colleagues                                                                                            |                                                                                                                                                                    |
| Kyaddondo & Whyte 2003[15]     | Ability to help family and relatives        |  | Lack of professional autonomy              | Unclear employment terms and conditions of service; Lack of employment confirmation; Low remuneration; Lack of promotions; Resource constraints; Lack of in-service training opportunities; Shortage of equipment and supplies |  | Lack of respect due to supervision by community members; | Diminished social value and respect due to supervision by community and loss of professional autonomy (provider-patient relationship) | Suspicion and circumscribing freedom of action by community due to closer community monitoring; Use of professional skills for respect and mutual social relations |

|                          |                                                                                                                     |                                                             |                                                                                                                            |                                                                                                                                                                                                                                                                                  |                                 |                                                                                              |                                                             |                                            |
|--------------------------|---------------------------------------------------------------------------------------------------------------------|-------------------------------------------------------------|----------------------------------------------------------------------------------------------------------------------------|----------------------------------------------------------------------------------------------------------------------------------------------------------------------------------------------------------------------------------------------------------------------------------|---------------------------------|----------------------------------------------------------------------------------------------|-------------------------------------------------------------|--------------------------------------------|
| Lambrou et al 2010[16]   | Respect; Job meaningfulness ; Pride                                                                                 |                                                             | Relationships with supervisors and colleagues; Salary; Work Environment                                                    |                                                                                                                                                                                                                                                                                  | Social acceptance; Appreciation |                                                                                              | Interpersonal relationships with supervisors and colleagues | Respect; Pride                             |
| Leshabari et al 2008[17] |                                                                                                                     |                                                             |                                                                                                                            | Low salaries; Working environment; Inadequate equipment and facilities; Lack of job description; Lack of feedback; Infrequent job performance evaluation; Lack of rewards; No in-service training; Poor intra-organizational communication; Lack of inclusion in decision making |                                 |                                                                                              | Lack of concern by employers for staff welfare              | Lack of intra-organizational communication |
| Malik et al 2010[18]     | Altruism/serving people; Work interest; Career growth; Ability to support oneself and family; Autonomy; Empowerment | Less career growth; Inability to support oneself and family | Opportunities for higher qualification; Good working environment; Personal safety; Good pay and other financial incentives | Poor supervision; Few opportunities for career development; Resource unavailability; Poor working conditions; Less pay; Heavy workload and long working hours                                                                                                                    | Social rewards; Respect         | Disrespect; Poor interpersonal relations; Less social rewards; Less social and personal time | Disrespect, poor Interpersonal relations                    |                                            |
| Manafa et al 2009[19]    | Low cost of living in rural area;                                                                                   |                                                             |                                                                                                                            | Lack of job descriptions; Unfair selection for continuous education and in-service training; Lack of rewards; High workloads; Lack of supplies and                                                                                                                               |                                 |                                                                                              | Relationship with patients                                  |                                            |

|                                       |                                                   |  |                                                                                                                                                                                     |                                                                                                                                                                                                                                         |                          |  |                                                                                                                                                      |                                                                                                                           |
|---------------------------------------|---------------------------------------------------|--|-------------------------------------------------------------------------------------------------------------------------------------------------------------------------------------|-----------------------------------------------------------------------------------------------------------------------------------------------------------------------------------------------------------------------------------------|--------------------------|--|------------------------------------------------------------------------------------------------------------------------------------------------------|---------------------------------------------------------------------------------------------------------------------------|
|                                       |                                                   |  |                                                                                                                                                                                     | equipment;<br>Inadequate supervision; Lack of autonomy; Lack of performance appraisal; Limited opportunities for career progression                                                                                                     |                          |  |                                                                                                                                                      |                                                                                                                           |
| Manongi, Merchant & Bygbjerg 2006[20] |                                                   |  |                                                                                                                                                                                     | Understaffing; Unclear job description (acting upwards or downwards); Gambling with health due to inadequate work facilities; Lack of in-service training; Lack of feedback after referrals; Inadequate supervision; Lack of promotions |                          |  | Lack of inter-professional exchange (during referrals); Lack of professional identity and recognition by employer and community                      | Distrust regarding promotion; To be trusted by community important for motivation                                         |
| Mathauer & Imhoff 2006[21]            | Professional and vocational conscience; Altruism; |  | Recognition by supervisors; Communication and feedback; Good work environment; Means and material availability; In-service training; Regular remuneration; Appreciation and rewards |                                                                                                                                                                                                                                         | Recognition by community |  | Recognition by community; Unhelpful and distant supervision rather than personal and supportive; Inadequate communication and bad treatment of staff | Reserved reaction towards patients with HIV because of fear of infection; Appreciation by patients; Envy among colleagues |

|                                 |                                         |                                                    |                                                             |                                                                                                                                                                                                                                                                                                                                |                                      |                                      |                                                                                                        |                                                                                                   |
|---------------------------------|-----------------------------------------|----------------------------------------------------|-------------------------------------------------------------|--------------------------------------------------------------------------------------------------------------------------------------------------------------------------------------------------------------------------------------------------------------------------------------------------------------------------------|--------------------------------------|--------------------------------------|--------------------------------------------------------------------------------------------------------|---------------------------------------------------------------------------------------------------|
| Mbilinyi, Daniel & Lie 2011[22] | Altruism/desire to help; Responsibility | Perceived risk of contracting HIV and tuberculosis | Essential drugs; Sufficient infrastructure; Human resources | Lack of acknowledgement and appreciation; Lack of clear job description; Shortage of essential supplies; Overtime work without pay of non-financial incentives; Staff shortages; Lack of fairness                                                                                                                              | Support & cooperation from community | Undervalued by community             | Relationship with patient (perceived stigma)                                                           | Patients blame HWs for poor services; Lack of trust between colleagues                            |
| Mbindyo et al 2009[23]          | Altruism; prestige; Job security        | Unmet expectations                                 | Supportive managers                                         | Staff shortages; Non-medical supplies and drug shortages; Relationships with colleagues; Lack of fairness in equal access to training opportunities; Lack of incentives; Lack of recognition and appreciation; Inadequate communication; Lack of promotions; Low salaries; Poor schemes of service; Lack of career development |                                      | Negative attitude from the community | Relationships with colleagues and supervisors; Relationship with patients; Poor teamwork across cadres | Young workers not trusting the system; Breakdown of trust between workers and central bureaucracy |
| Mubyazi et al 2012[24]          |                                         |                                                    |                                                             | Understaffing; Increased workload; Less supportive supervision; Limited career development opportunities; Poor health facility infrastructure                                                                                                                                                                                  |                                      |                                      | Relationship with supervisor                                                                           |                                                                                                   |

|                             |                                                                                                   |  |                                                                                                                                                           |                                                                                                                                                                                                                                       |                                                   |                                        |                                                                                                                                           |                                                                        |
|-----------------------------|---------------------------------------------------------------------------------------------------|--|-----------------------------------------------------------------------------------------------------------------------------------------------------------|---------------------------------------------------------------------------------------------------------------------------------------------------------------------------------------------------------------------------------------|---------------------------------------------------|----------------------------------------|-------------------------------------------------------------------------------------------------------------------------------------------|------------------------------------------------------------------------|
| Newton et al<br>2009[25]    | Desire to help;<br>Caring motive;<br>Sense of<br>achievement<br>(positive<br>acknowledgem<br>ent) |  |                                                                                                                                                           |                                                                                                                                                                                                                                       | Recognition<br>and<br>appreciation<br>by patients |                                        | Relationship<br>with patients                                                                                                             |                                                                        |
| Peters et al<br>2010[26]    |                                                                                                   |  | Job location;<br>Income levels;<br>Training<br>opportunities;<br>Tools for job;<br>Good<br>employment<br>benefits;<br>Recognition;<br>Good<br>supervision | Work demands;                                                                                                                                                                                                                         | Time for<br>family life                           |                                        | Relationships<br>with colleagues                                                                                                          | Trusted by clients                                                     |
| Prytherch et al<br>2012[27] |                                                                                                   |  | In-service<br>training;                                                                                                                                   | Understaffing; Heavy<br>workload; Lack of<br>promotion; Work<br>environment; Low<br>pay; Poor security;<br>Lack of job<br>description; Poor<br>supervision and<br>performance<br>appraisal; Lack of<br>autonomy; Unfair<br>promotions | Community<br>appreciation                         | Lack of<br>professional<br>association | Relationship<br>with community<br>(congratulate &<br>appreciate HW);<br>Relationship<br>with supervisor;<br>Relationship<br>with patients | Blames by<br>supervisor;<br>Mistrust; Patients<br>blames<br>management |
| Prytherch et al<br>2013[28] | Altruism;<br>Appreciation                                                                         |  | Good<br>supervision;<br>Support from<br>managers;<br>Transparent<br>salary levels;<br>Salary increase<br>& retirement<br>benefits                         | Inadequate living<br>conditions; Lack of<br>incentives; Lack of<br>job description;<br>Heavy workload;<br>Difficult working<br>conditions                                                                                             |                                                   |                                        | Relationships<br>with managers,<br>supervisors,<br>colleagues and<br>patients                                                             | Asking colleague<br>for help; Keeping<br>quiet when unsure             |



|                          |                         |                                                                        |                                                                                                                                                                                                               |                                                                                                                                                                                  |                                                                                                          |                                      |                                                              |                                                            |
|--------------------------|-------------------------|------------------------------------------------------------------------|---------------------------------------------------------------------------------------------------------------------------------------------------------------------------------------------------------------|----------------------------------------------------------------------------------------------------------------------------------------------------------------------------------|----------------------------------------------------------------------------------------------------------|--------------------------------------|--------------------------------------------------------------|------------------------------------------------------------|
| Razee et al<br>2012[29]  |                         | Meeting family obligations;<br>Inadequate Personal safety and security |                                                                                                                                                                                                               | Workplace safety                                                                                                                                                                 | Support from local community;<br>Respect and appreciation by patients and community;<br>Social belonging | Societal expectation on gender roles | Relationships with colleagues and patients                   | Lack of trust and respect; Trust for community cooperation |
| Siril et al<br>2011[30]  | Altruism/desire to help | Emotional drainage                                                     | Adequate supervision;<br>Feedback and performance appraisal; In-service training;<br>Availability of resources;<br>Teamwork;<br>Good working environment;<br>Adequate support;<br>Availability of information |                                                                                                                                                                                  |                                                                                                          |                                      | Teamwork;<br>Good relationship with supervisors              | Understanding each other; Respect                          |
| Zinnen et al<br>2012[31] | Job security            |                                                                        | Career development;<br>Supportive supervision                                                                                                                                                                 | Inadequate salary & retirement benefits;<br>Inadequate basic working equipment;<br>Staff shortages;<br>Work overload; Lack of services;<br>Favouritism;<br>Inadequate promotions |                                                                                                          |                                      | Relationship with management<br>Relationship with supervisor | Disrespect, harsh language                                 |

## References

1. Agyepong IA, Anafi P, Asiamah E, Ansah EK, Ashon DA, Narh-Dometey C: **Health worker [internal customer] satisfaction and motivation in the public sector in Ghana.** Int J Health Plann Manage 2004, **19**(4):319-336.
2. Alhassan RK, Spieker N, van Ostenberg P, Ogink A, Nketiah-Amponsah E, de Wit TFR: **Association between health worker motivation and healthcare quality efforts in Ghana.** Hum Resour Health 2013, **11**(1).
3. Campbell C, Scott K, Madenhire C, Nyamukapa C, Gregson S: **Sources of motivation and frustration among healthcare workers administering antiretroviral treatment for HIV in rural Zimbabwe.** AIDS Care Psychol Socio-Med Asp AIDS HIV 2011, **23**(7):797-802.
4. Chandler CIR, Chonya S, Mtei F, Reyburn H, Whitty CJM: **Motivation, money and respect: a mixed-method study of Tanzanian non-physician clinicians.** Soc Sci Med 2009, .
5. Dickin KL, Dollahite JS, Habicht J-: **Enhancing the intrinsic work motivation of community nutrition educators: How supportive supervision and job design foster autonomy.** J Ambul Care Manage 2011, **34**(3):260-273.
6. Dieleman M, Cuong P, Anh L, Martineau T: **Identifying factors for job motivation of rural health workers in North Viet Nam.** Human Resources for Health 2003, **1**.
7. Dieleman M, Toonen J, Touré H, Martineau T: **The match between motivation and performance management of health sector workers in Mali.** Hum Resour Health 2006, **4**(2):00035-00033.
8. Franco LM, Bennett S, Kanfer R, Stubblebine P: **Determinants and consequences of health worker motivation in hospitals in Jordan and Georgia.** Soc Sci Med 2004, **58**(2):343-355.
9. Greenspan JA, McMahon SA, Chebet JJ, Mpunga M, Urassa DP, Winch PJ: **Sources of community health worker motivation: A qualitative study in Morogoro Region, Tanzania.** Hum Resour Health 2013, **11**(1).
10. Hegney D, Plank A, Parker V: **Extrinsic and intrinsic work values: Their impact on job satisfaction in nursing.** J Nurs Manage 2006, **14**(4):271-281.
11. Kahler L, Kristiansen M, Rudkjobing A, Strandberg-Larsen M: **Surgeons' motivation for choice of workplace.** Dan Med J 2012, **59**(9):A4508.
12. Kok MC, Muula AS: **Motivation and job satisfaction of health surveillance assistants in Mwanza, Malawi: An explorative study.** Malawi Med J 2013, **25**(1):5-11.
13. Kontodimopoulos N, Paleologou V, Niakas D: **Identifying important motivational factors for professionals in Greek hospitals.** BMC health services research 2009, **9**(1):164.

14. Kudo Y, Kido S, Shahzad MT, Shida K, Satoh T, Aizawa Y: **Enhancing work motivation for Japanese female nurses in small to medium-sized private hospitals by analyzing job satisfaction.** *Tohoku J Exp Med* 2010, **220**(3):237-245.
15. Kyaddondo D, Whyte SR: **Working in a decentralized system: a threat to health workers' respect and survival in Uganda.** *Int J Health Plann Manage* 2003, **18**(4):329-342.
16. Lambrou P, Kontodimopoulos N, Niakas D: **Motivation and job satisfaction among medical and nursing staff in a Cyprus public general hospital.** 2010, .
17. Leshabari MT, Muhondwa EPY, Mwangu MA, Mbembati NAA, M TL, Muhondwa E, M AM, Mbembati N: **Motivation of health care workers in Tanzania: a case study of Muhimbili National Hospital.** *East African Journal of Public Health* 2008, **5**; 5(1; 1):32; 32-37; 37.
18. Malik AA, Yamamoto SS, Souares A, Malik Z, Sauerborn R: **Motivational determinants among physicians in Lahore, Pakistan.** *BMC Health Serv Res* 2010, **10**:201-6963-10-201.
19. Manafa O, McAuliffe E, Maseko F, Bowie C, MacLachlan M, Normand C: **Retention of health workers in Malawi: perspectives of health workers and district management.** *Human Resources for Health* 2009, **7**(1):65.
20. Manongi RN, Marchant TC, Bygbjerg IC: **Improving motivation among primary health care workers in Tanzania: a health worker perspective.** *Human resources for health* 2006, **4**(1):6.
21. Mathauer I, Imhoff I: **Health worker motivation in Africa: the role of non-financial incentives and human resource management tools.** *Human resources for health* 2006, **4**(1):24.
22. Mbilinyi D, Daniel ML, Lie GT: **Health worker motivation in the context of HIV care and treatment challenges in Mbeya Region, Tanzania: a qualitative study.** *BMC Health Serv Res* 2011, **11**:266-6963-11-266.
23. Mbindyo P, Gilson L, Blaauw D, English M: **Contextual influences on health worker motivation in district hospitals in Kenya.** *Implementation Science* 2009, **4**(1):43.
24. Mubyazi GM, Njunwa K: **Perceived Impact of Health Sector Reform on Motivation of Health Workers and Quality of Health Care in Tanzania: the Perspectives of Healthcare Workers and District Council Health Managers in Four Districts.** *Rwanda Journal of Health Sciences* 2013, **2**(1):43-54.
25. Newton JM, Kelly CM, Kremser AK, Jolly B, Billett S: **The motivations to nurse: An exploration of factors amongst undergraduate students, registered nurses and nurse managers.** *J Nurs Manage* 2009, **17**(3):392-400.

26. Peters DH, Chakraborty S, Mahapatra P, Steinhardt L: **Job satisfaction and motivation of health workers in public and private sectors: Cross-sectional analysis from two Indian states.** Hum Resour Health 2010, **8**.
27. Prytherch H, Kakoko DC, Leshabari MT, Sauerborn R, Marx M: **Maternal and newborn healthcare providers in rural Tanzania: in-depth interviews exploring influences on motivation, performance and job satisfaction.** Rural Remote Health 2012, **12**:2072.
28. Prytherch H, Kagone M, Aninanya GA, Williams JE, Kakoko DC, Leshabari MT, Ye M, Marx M, Sauerborn R: **Motivation and incentives of rural maternal and neonatal health care providers: a comparison of qualitative findings from Burkina Faso, Ghana and Tanzania.** BMC Health Serv Res 2013, **13**:149-6963-13-149.
29. Razee H, Whittaker M, Jayasuriya R, Yap L, Brentnall L: **Listening to the rural health workers in Papua New Guinea - The social factors that influence their motivation to work.** Soc Sci Med 2012, **75**(5):828-835.
30. Siril H, Hirschhorn LR, Hawkins C, Garcia ME, Li MS, Ismail S, Mdingi SG, Chalamilla G, Fawzi W, Kaaya S: **Stress, motivation and professional satisfaction among health care workers in HIV/AIDS care and treatment centers in urban Tanzania: a cross-sectional study.** East Afr J Public Health 2011, **8**(1):17-24.
31. Zinnen V, Paul E, Mwisongo A, Nyato D, Robert A: **Motivation of human resources for health: A case study at rural district level in Tanzania.** Int J Health Plann Manage 2012, **27**(4):327-347.
